# Supplementary figures and images for: Therapeutic Potential of Fingolimod and Dimethyl Fumarate in Non-Small Cell Lung Cancer Preclinical Models
Source: MDPI journal article supplement (doi:10.3390/ijms23158192), 2022-07-25

Figure S2

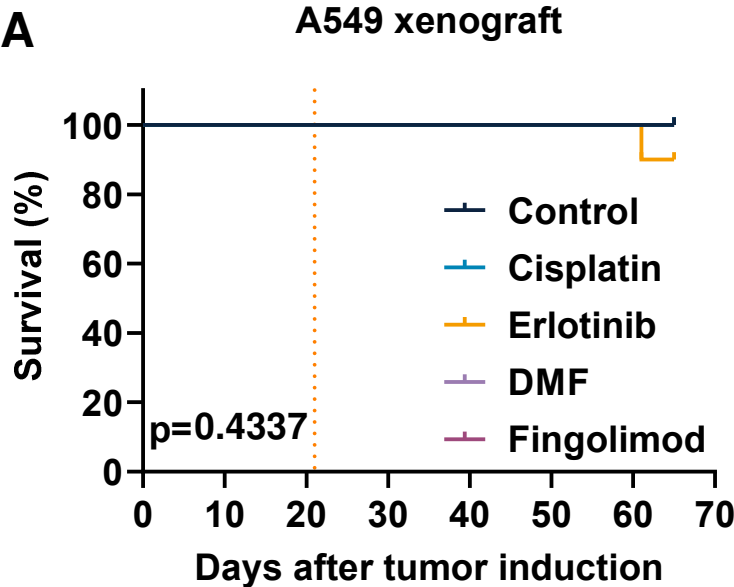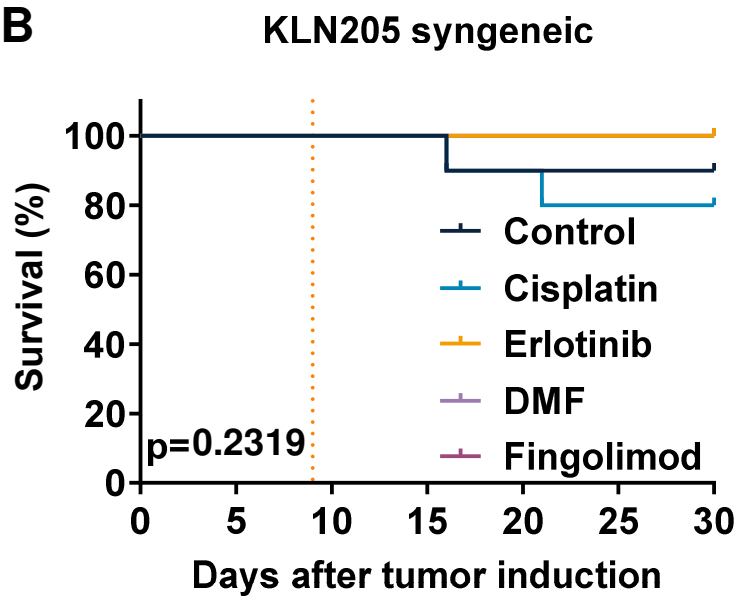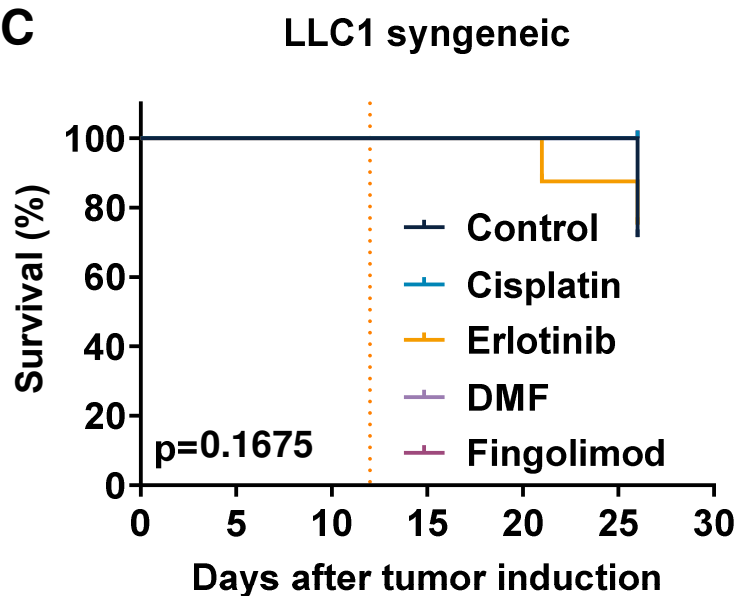

Supplement: s1 [file s1]

Figure S1

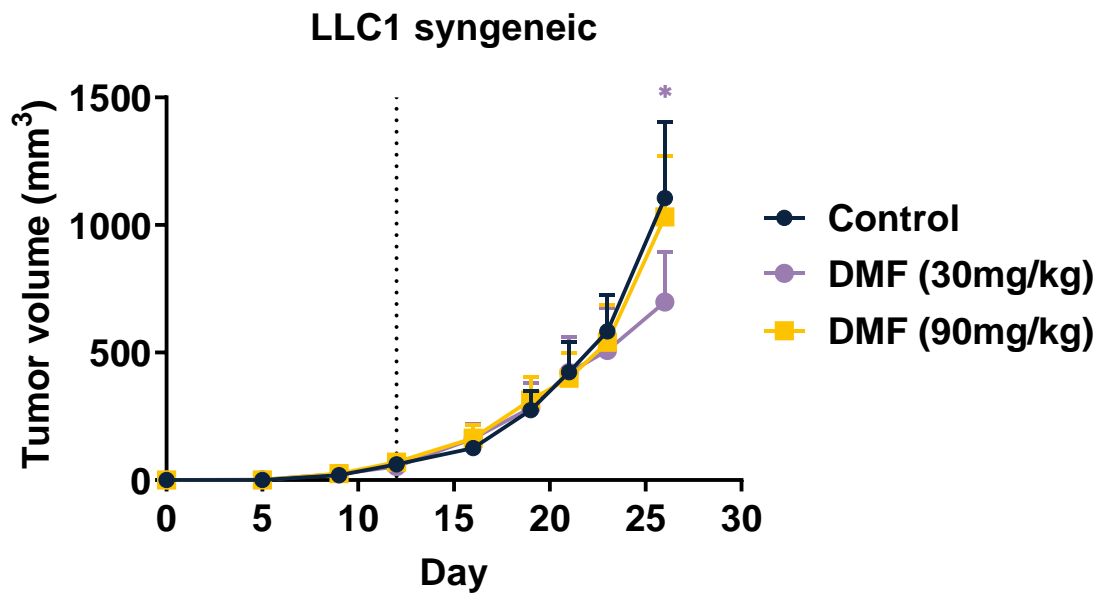

Supplement: s1 [file s1]

**Figure S3**

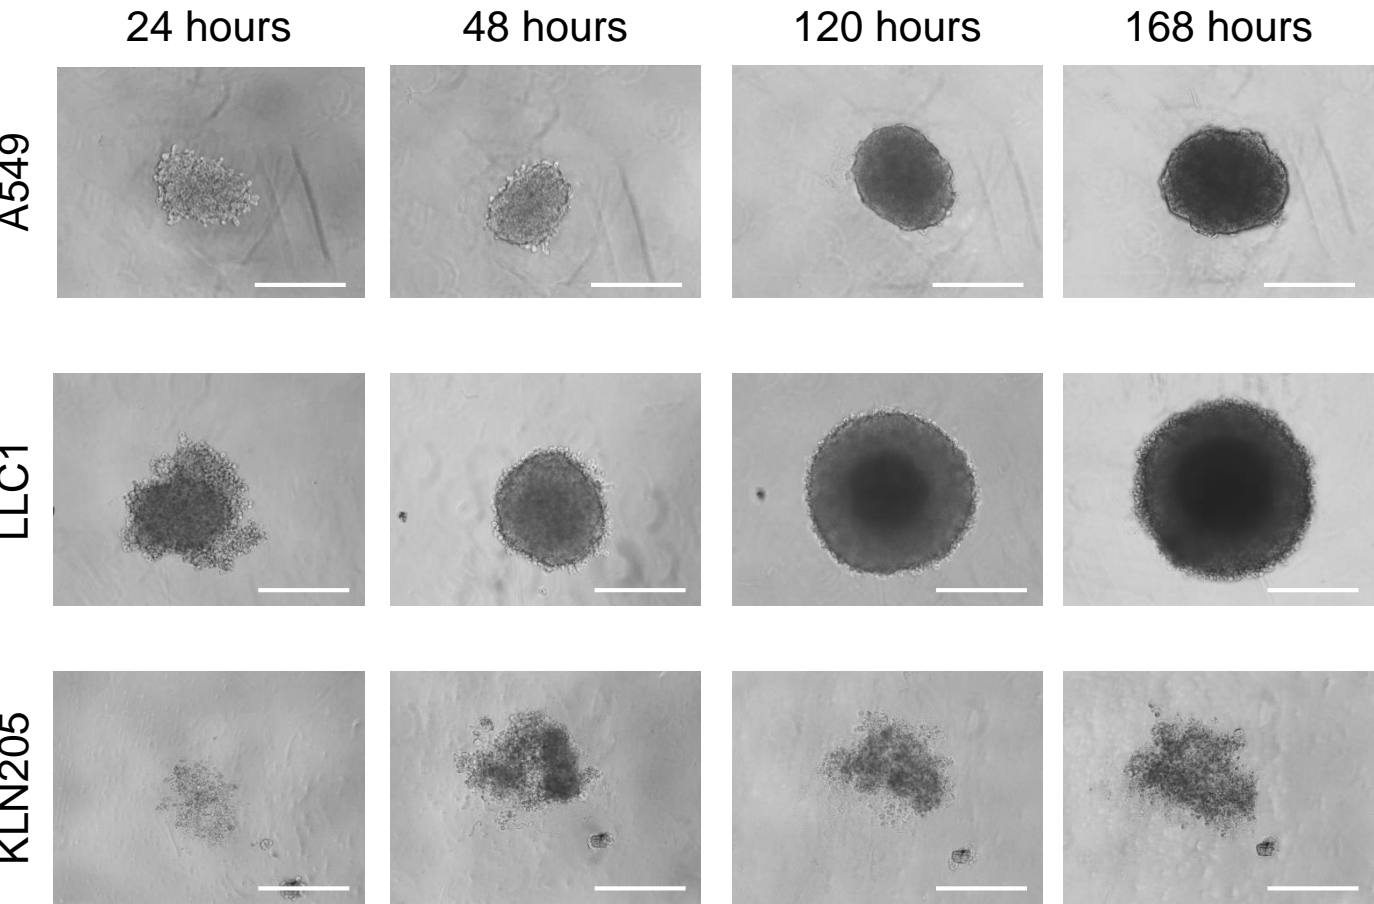

Supplement: s1 [file s1]

Figure S4

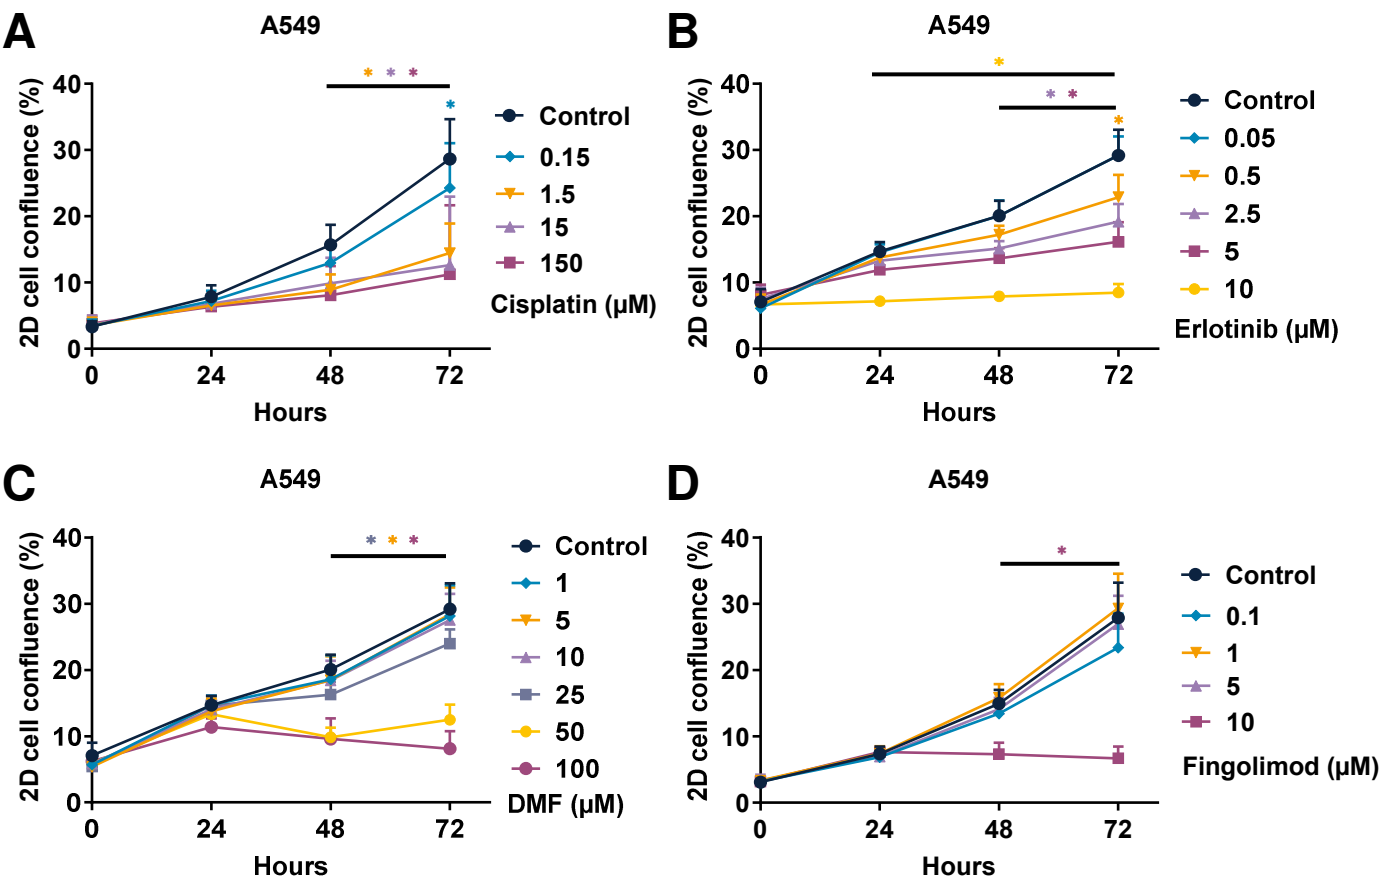

Supplement: s1 [file s1]
